# Supplementary material
Source: Springer Nature journal article supplement (https://www.springermedizin.de/resource/supplementary/12888_2013_1845_MOESM1_ESM.pdf/9481538)
Supplement: MOESM1 [file 9481538]

| <p>Respondents<br/>T1<br/><br/>(2003-2004)</p> | <p>Update contact</p>                                   | <p>Outcome interview</p>                                        | <p>Respondents<br/>T2<br/><br/>(2010-2011)</p> |
|------------------------------------------------|---------------------------------------------------------|-----------------------------------------------------------------|------------------------------------------------|
| <p>178 PH</p>                                  | <p>142: valid address<br/><br/>36: no valid address</p> | <p>104: interview<br/>36: no interview<br/>36: no interview</p> | <p>104: long standing PH</p>                   |
| <p>232<br/>asylum seekers</p>                  | <p>140: valid address<br/><br/>92: no valid address</p> | <p>68: interview<br/>72: no interview<br/>92: no interview</p>  | <p>68: new PH</p>                              |
